# Supplementary material for: Aminoglycoside resistance profile and structural architecture of the aminoglycoside acetyltransferase AAC(6')-Im
Source: PubMed Central journal article supplement (PMC5722643; doi:10.15698/mic2017.12.602), 2017-11-09
Supplement: mic-04-402-s01.pdf [file mic-04-402-s01.pdf]

Supplementary information for

**Aminoglycoside resistance profile and structural architecture of the aminoglycoside  
acetyltransferase AAC(6')-Im**

Clyde A. Smith<sup>1,\*</sup>, Monolekha Bhattacharya<sup>2</sup>, Marta Toth<sup>2</sup>, Nichole K. Stewart<sup>2</sup>, and Sergei B.  
Vakulenko<sup>2,\*</sup>

<sup>1</sup>Stanford Synchrotron Radiation Lightsource, SLAC National Accelerator Laboratory, Menlo  
Park, CA 94025

<sup>2</sup>Department of Chemistry and Biochemistry, University of Notre Dame, Notre Dame, IN 46556

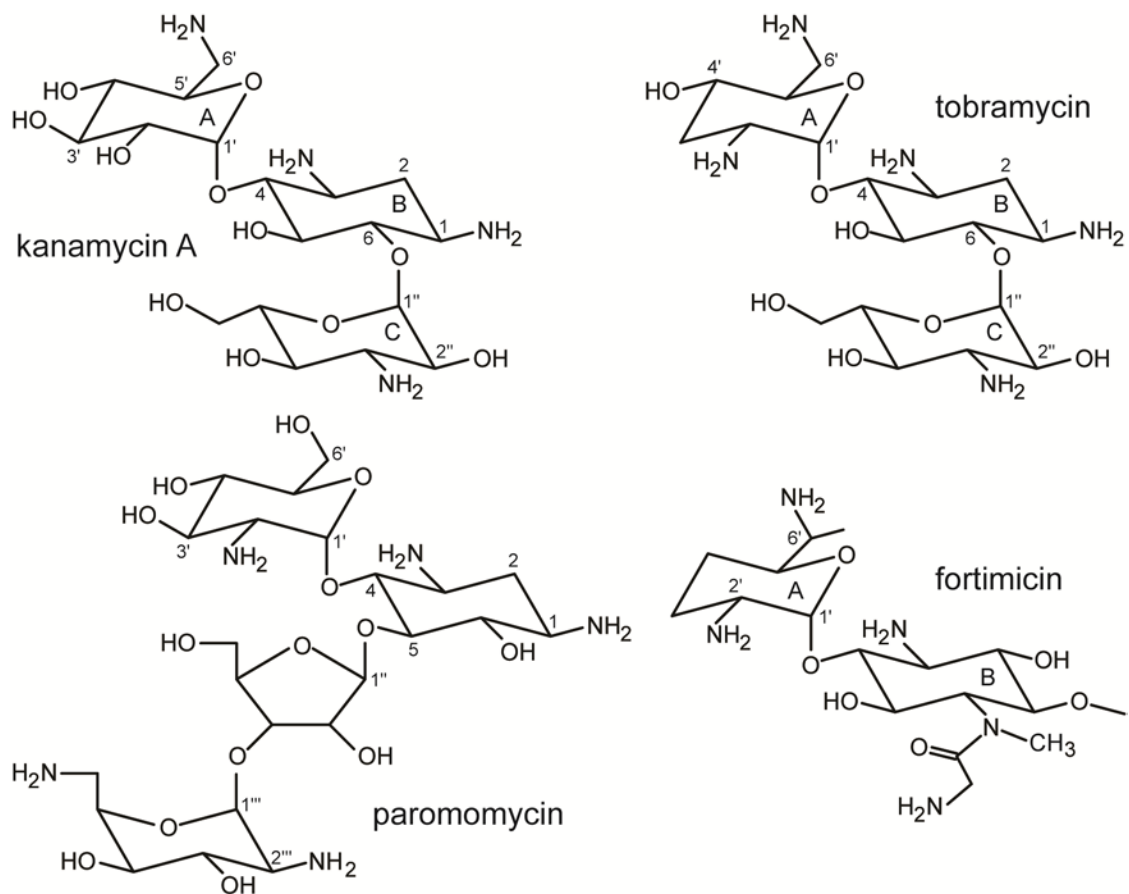

**Figure S1. Structures of aminoglycosides.** Kanamycin A and tobramycin are examples of 4,6-disubstituted aminoglycoside, paromomycin is a 4,5-disubstituted aminoglycoside, and fortimicin is an example of an atypical aminoglycoside.

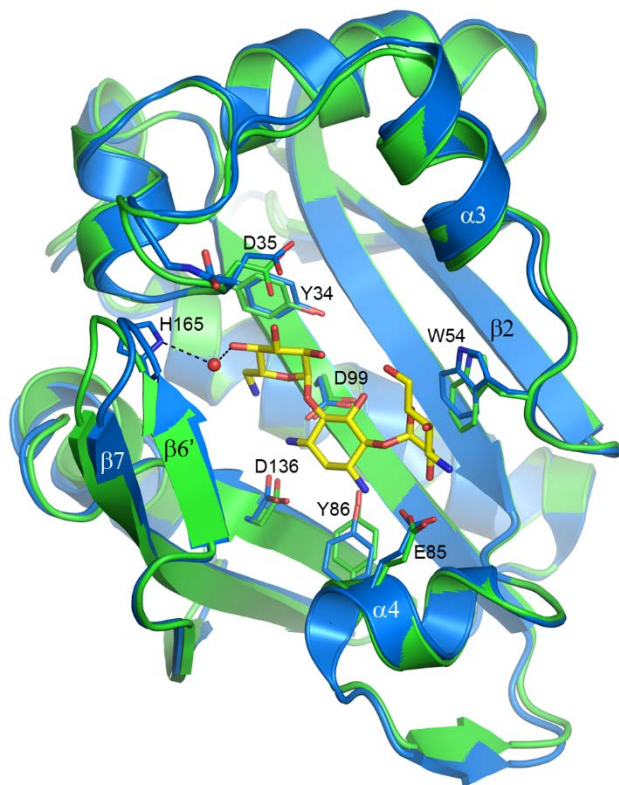

**Figure S2. Structure of AAC(6')-Im.** Superposition of apo-AAC(6')-Im (green) and the AAC(6')-Im-kanamycin A complex (blue), showing kanamycin A as yellow sticks. The residues involved in kanamycin A binding are also indicated for apo-AAC(6')-Im (green sticks) and AAC(6')-Im-kanamycin A (blue sticks).

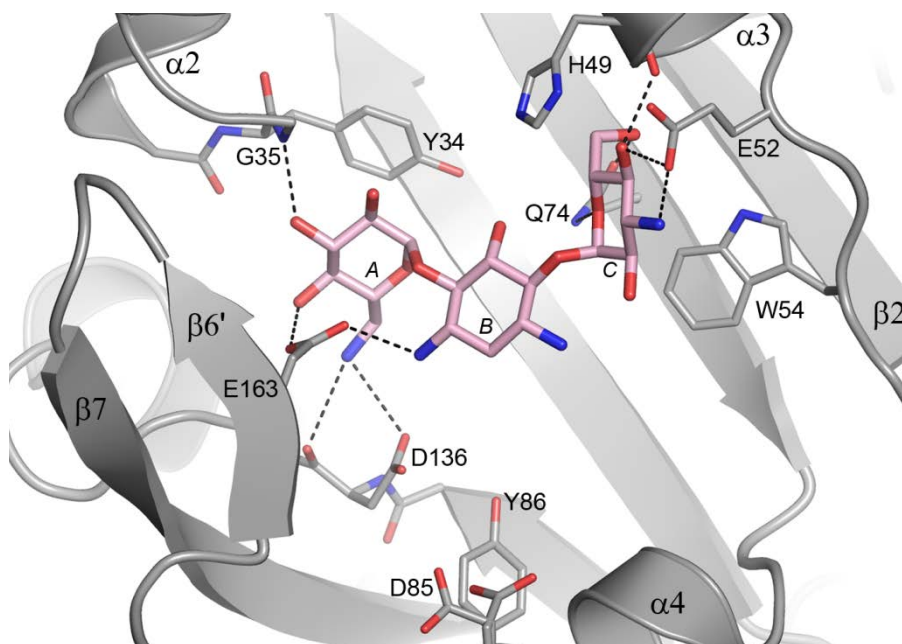

**Figure S3. The kanamycin A binding site of AAC(6')-Ie.** The AAC(6')-Ie structure is shown as gray ribbons. Hydrogen bonding interactions of kanamycin A (shown as pink sticks) with the protein side chains (gray sticks) are shown as black dashed lines. The A, B and C rings of the kanamycin A are labeled in italics. The orientation is similar to that in Figure 4, which obscures two hydrogen bonds between the side chain of Gln74 and the C ring.

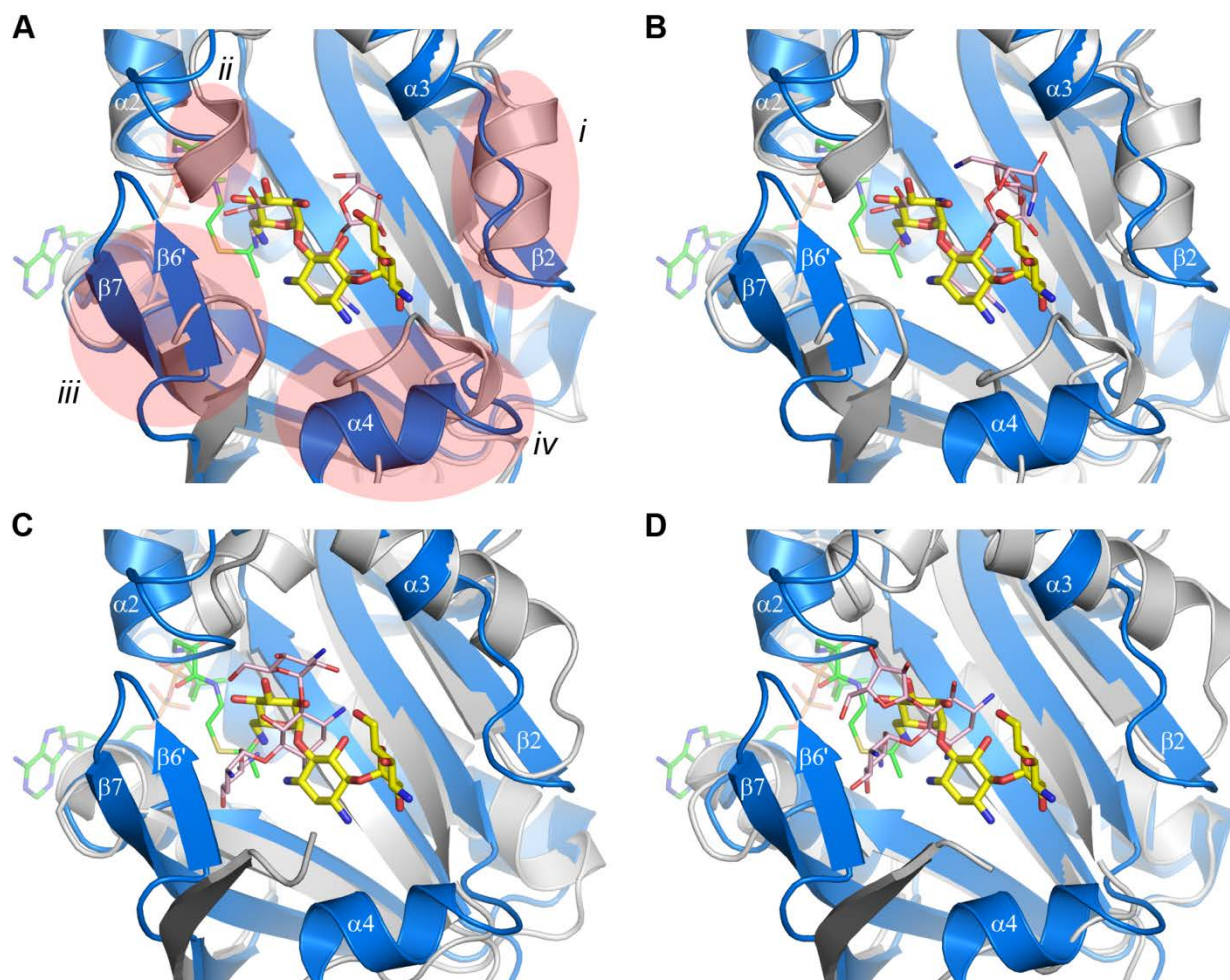

**Figure S4. Structural comparison of AAC(6')-Im with other AAC(6') enzymes.** The AAC(6')-Im-kanamycin A structure is colored blue in all panels while the other AAC(6') enzymes are colored light gray. The bound kanamycin A is shown as yellow sticks. An acetyl-CoA molecule (green) from the abortive AAC(6')-Ib-acetyl-CoA-kanamycin C complex (PDB code 1V0C) is also shown in all panels. **(A)** Superposition of AAC(6')-Im-kanamycin A with AAC(6')-Ib-ribostamycin. The ribostamycin is shown as thin pink sticks. The four main regions of structural difference near the substrate binding site are indicated in pale red and numbered as follows: (i) the loop between helix  $\alpha 3$  and strand  $\beta 2$  in AAC(6')-Im is replaced by an  $\alpha$ -helix in AAC(6')-Ib; (ii) the  $\alpha 2$ - $\alpha 3$  loop is lengthened by a single turn of  $3_{10}$  helix; (iii) the absence of the strand equivalent to  $\beta 6'$  and the shortening of strand  $\beta 7$ ; and (iv) the replacement of helix  $\alpha 4$  and

strand  $\beta 4'$  by an unstructured loop which projects into the binding site. **(B)** Superposition of AAC(6')-Im-kanamycin A with AAC(6')-Ib-paromomycin. The paromomycin is shown as thin pink sticks. **(C)** Superposition of AAC(6')-Im with AAC(6')-Ig-tobramycin. The tobramycin is shown as thin pink sticks. **(D)** Superposition of AAC(6')-Im-kanamycin A with AAC(6')-Iy-ribostamycin. The ribostamycin is shown as thin pink sticks.

**Table S1. Crystallographic data collection and refinement statistics for AAC(6′)-Im**

|                                           | apo-AAC(6′)-Im          | AAC(6′)-Im-kanamycin A <sup>a</sup> |
|-------------------------------------------|-------------------------|-------------------------------------|
| <b>Data collection</b>                    |                         |                                     |
| Space Group                               | C2                      | P6 <sub>5</sub>                     |
| Cell dimensions a, b, c (Å)               | 161.52, 34.94, 67.31    | 107.75, 107.75, 37.33               |
| α, β, γ (°)                               | 90.0, 102.3, 90.0       | 90.0, 90.0, 120.0                   |
| Resolution (Å)                            | 39.6 – 1.70             | 19.9 – 1.95                         |
| Reflections, observed/unique              | 141536 / 39815          | 130956 / 18370                      |
| R <sub>merge</sub> (%)                    | 6.1 (57.7) <sup>b</sup> | 6.6 (74.3)                          |
| I/σ <sub>I</sub>                          | 12.9 (2.3)              | 18.2 (3.6)                          |
| Completeness (%)                          | 96.9 (91.8)             | 99.8 (98.4)                         |
| CC <sub>1/2</sub> <sup>c</sup>            | 99.8 (78.4)             | 99.9 (89.6)                         |
| Multiplicity                              | 3.6 (3.5)               | 7.3 (7.1)                           |
| Wilson B value                            | 20.6                    | 25.1                                |
| <b>Refinement</b>                         |                         |                                     |
| R <sub>work</sub> / R <sub>free</sub> (%) | 18.57 / 23.32           | 17.81 / 20.50                       |
| Protein atoms/solvent atoms               | 3034 / 281              | 1499 / 83                           |
| Average B – protein (Å <sup>2</sup> )     | 26.5, 28.5              | 37.2                                |
| – solvent (Å <sup>2</sup> )               | 34.3                    | 41.0                                |
| rmsd bonds (Å)                            | 0.008                   | 0.008                               |
| rmsd angles (°)                           | 0.903                   | 1.13                                |
| Ramachandran plot <sup>d</sup>            |                         |                                     |
| - favoured and allowed regions (%)        | 98.7                    | 97.5                                |
| - number in disallowed regions            | 2                       | 1                                   |

<sup>a</sup> Data collection statistics for form III were previously reported to 2.0 Å resolution [1] and have been reprocessed to 1.95 Å resolution prior to the refinement of the structure.

<sup>b</sup> Values in parentheses are for the outer resolution shells, 1.75 - 1.70 Å for apo-AAC(6′)-Im and 2.00 - 1.95 Å for AAC(6′)-Im-kanamycin A.

<sup>c</sup> CC<sub>1/2</sub> is the correlation between random half-sets of data [2].

<sup>d</sup> As calculated by MOLPROBITY [3].

**Table S2. Hydrogen bonding interactions between kanamycin A and AAC(6')-Im**

| kanamycin ring | atom <sup>a</sup> | partner                | distance (Å) |
|----------------|-------------------|------------------------|--------------|
| A              | O3' (O7)          | Asp35 O <sub>d1</sub>  | 3.23         |
|                | O4' (O8)          | Asp35 N                | 2.00         |
|                | O6' (O5)          | Asp99 O <sub>d1</sub>  | 3.15         |
|                | N6' (N1)          | Asp99 O <sub>d1</sub>  | 3.04         |
| B              | N1 (N3)           | Glu85 O <sub>e1</sub>  | 2.86         |
|                |                   | Tyr86 O <sub>η</sub>   | 3.09         |
|                | N3 (N2)           | Asp136 O <sub>δ1</sub> | 3.08         |
|                |                   | Asp136 O <sub>δ2</sub> | 3.13         |
|                |                   | Asp99 O <sub>d1</sub>  | 2.84         |
| C              | O2'' (O13)        | Glu85 O <sub>e1</sub>  | 2.55         |
|                |                   | Glu85 O <sub>e2</sub>  | 3.22         |
|                | N3'' (N4)         | Glu85 O <sub>e2</sub>  | 2.66         |

<sup>a</sup> The atom name in the PDB file is given in parentheses.



**Table S3. Structural and sequence similarities in the AAC(6') enzymes<sup>a</sup>**

|                | Enzyme | -Im   | -Ie       | -Ib       | -Ii       | -Ig       | -Ih       | -Iy       |
|----------------|--------|-------|-----------|-----------|-----------|-----------|-----------|-----------|
| C <sup>b</sup> | -Im    | -     | 1.0 (174) | 1.7 (156) | 2.4 (131) | 2.7 (131) | 3.0 (128) | 2.9 (134) |
|                | -Ie    | 60.3% | -         | 1.9 (157) | 2.3 (130) | 2.6 (134) | 2.8 (129) | 2.8 (133) |
|                | -Ib    | 26.3% | 24.8%     | -         | 2.4 (129) | 2.5 (126) | 2.7 (128) | 2.5 (127) |
| B              | -Ii    | 13.7% | 15.4%     | 17.8%     | -         | 1.8 (122) | 1.8 (123) | 1.7 (127) |
| A              | -Ig    | 9.9%  | 11.2%     | 14.3%     | 13.1%     | -         | 0.6 (146) | 1.0 (144) |
|                | -Ih    | 11.7% | 11.6%     | 12.5%     | 17.9%     | 71.2%     | -         | 1.3 (146) |
|                | -Iy    | 13.4% | 12.8%     | 16.5%     | 17.3%     | 40.3%     | 43.2%     | -         |

<sup>a</sup> The numbers above the diagonal are the root mean square deviations (*rmsds*) in C $\alpha$  positions between the pairs of enzymes, with the number of matching C $\alpha$  atoms given in parentheses. The numbers below the diagonal are the pairwise sequence identities.

<sup>b</sup> The enzymes are grouped by their sub-family classification.

## Supplementary references

1. Toth M, Vakulenko SB, Smith CA (2012). Purification, crystallization and preliminary X-ray analysis of the aminoglycoside-6'-acetyltransferase AAC(6')-Im. **Acta Crystallogr** F68(4): 472-475. doi: 10.1107/S174430910500775X
2. Karplus PA, Diederichs K (2012). Linking crystallographic model and data quality. **Science** 336(6084): 1030-1033. doi: 10.1126/science.1218231
3. Chen VB, Arendall WB, Headd JJ, Keedy DA, Immormino RM, Kapral GJ, Murray LW, Richardson JS, Richardson DC (2010). MolProbity: All-atom structure validation for macromolecular crystallography. **Acta Crystallogr** D66(1): 12-21. doi: 10.1107/S09074444909042073
